# Isoflurane Regulates Atypical Type-A $\gamma$ -Aminobutyric Acid Receptors in Alveolar Type II Epithelial Cells

Yun-Yan Xiang, M.D., Ph.D.,\* Xuanmao Chen, Ph.D.,† Jingxin Li, M.D., Ph.D.,‡  
Shuanglian Wang, M.D., Ph.D.,§ Gil Faclier, M.D., F.R.C.P.C.,|| John F. MacDonald, Ph.D.,#  
James C. Hogg, M.D., Ph.D., F.R.C.P.C.,\*\* Beverley A. Orser, M.D., Ph.D., F.R.C.P.C.,††  
Wei-Yang Lu, M.D., Ph.D.‡‡

## ABSTRACT

**Background:** Volatile anesthetics act primarily through upregulating the activity of  $\gamma$ -aminobutyric acid type A (GABA<sub>A</sub>) receptors. They also exhibit antiinflammatory actions in the lung. Rodent alveolar type II (ATII) epithelial cells express GABA<sub>A</sub> receptors and the inflammatory factor cyclooxygenase-2 (COX-2). The goal of this study was to determine whether human ATII cells also express GABA<sub>A</sub> receptors and whether volatile anesthetics upregulate GABA<sub>A</sub> receptor activity, thereby reducing the expression of COX-2 in ATII cells.

**Methods:** The expression of GABA<sub>A</sub> receptor subunits and COX-2 in ATII cells of human lung tissue and in the human ATII cell line A549 was studied with immunostaining and immunoblot analyses. Patch clamp recordings were used

## What We Already Know about This Topic

- $\gamma$ -Aminobutyric acid type A receptors are expressed in rodent lung tissue where their activation inhibits cytokine release, perhaps contributing to an antiinflammatory action

## What This Study Tells Us That Is New

- Human alveolar type II cells were shown to express  $\gamma$ -aminobutyric acid type A receptors with some unique pharmacologic properties
- The volatile anesthetics isoflurane and sevoflurane upregulate these  $\gamma$ -aminobutyric acid type A receptors to inhibit cyclooxygenase-2 expression
- Volatile anesthetic regulation of  $\gamma$ -aminobutyric acid type A receptors might contribute to antiinflammatory effects in the lung

\* Research Associate, § Postdoctoral Fellow, # Professor, Department of Physiology and Pharmacology and Robarts Research Institute, University of Western Ontario, London, Ontario, Canada. † Postdoctoral Fellow, Department of Physiology and Pharmacology and Robarts Research Institute, University of Western Ontario, and Department of Anesthesia, University of Toronto, Toronto, Ontario, Canada. ‡ Postdoctoral Fellow, || Assistant Professor, †† Professor, Department of Anesthesia and Physiology, University of Toronto and Sunnybrook Health Sciences Center, Toronto, Ontario, Canada. \*\* Professor, Department of Pathology and Laboratory Medicine, University of British Columbia, Vancouver, British Columbia, Canada, and the James Hogg Research Centre, St. Paul's Hospital, Vancouver, British Columbia, Canada. ‡‡ Associate Professor, Department of Physiology and Pharmacology and Robarts Research Institute, University of Western Ontario, and Adjunct Professor, Department of Anesthesia, University of Toronto.

Received from the Department of Physiology and Pharmacology, and Robarts Research Institute, Western University, London, Ontario, Canada. Submitted for publication May 5, 2012. Accepted for publication November 30, 2012. This work was funded by the Canadian Institutes of Health Research (Ottawa, Ontario, Canada), grant MOB-84517 to Dr. Lu. Drs. Xiang and Chen made equal contributions to this study. Figure 6 was redrawn by Annemarie B. Johnson, C.M.I., Medical Illustrator, Wake Forest University School of Medicine Creative Communications, Wake Forest University Medical Center, Winston-Salem, North Carolina.

Address correspondence to Dr. Lu: Department of Physiology and Pharmacology, Robarts Research Institute, University of Western Ontario, 100 Perth Drive, London, Ontario N6A 5K8 Canada. wlu53@uwo.ca. Information on purchasing reprints may be found at [www.anesthesiology.org](http://www.anesthesiology.org) or on the masthead page at the beginning of this issue. ANESTHESIOLOGY's articles are made freely accessible to all readers, for personal use only, 6 months from the cover date of the issue.

Copyright © 2013, the American Society of Anesthesiologists, Inc. Lippincott Williams & Wilkins. Anesthesiology 2013; 118:1065-75

to study the functional and pharmacological properties of GABA<sub>A</sub> receptors in cultured A549 cells.

**Results:** ATII cells in human lungs and cultured A549 cells expressed GABA<sub>A</sub> receptor subunits and COX-2. GABA induced currents in A549 cells, with half-maximal effective concentration of 2.5  $\mu$ M. Isoflurane (0.1–250  $\mu$ M) enhanced the GABA currents, which were partially inhibited by bicuculline. Treating A549 cells with muscimol or with isoflurane (250  $\mu$ M) reduced the expression of COX-2, an effect that was attenuated by cotreatment with bicuculline.

**Conclusions:** GABA<sub>A</sub> receptors expressed by human ATII cells differ pharmacologically from those in neurons, exhibiting a higher affinity for GABA and lower sensitivity to bicuculline. Clinically relevant concentrations of isoflurane increased the activity of GABA<sub>A</sub> receptors and reduced the expression of COX-2 in ATII cells. These findings reveal a novel mechanism that could contribute to the antiinflammatory effect of isoflurane in the human lung.

$\gamma$ -AMINO BUTYRIC acid (GABA) is a major inhibitory neurotransmitter in the central nervous system. GABA generates fast inhibition in mature neurons *via* activation of

- ◆ This article is accompanied by an Editorial View. Please see: Gallos G, Emala CW: Anesthetic effects on  $\gamma$ -aminobutyric acid A receptors: Not just on your nerves. ANESTHESIOLOGY 2013; 118:1013–5.

type-A GABA (GABA<sub>A</sub>) receptors, a class of pentameric ion channels that are highly permeable to chloride anions (Cl<sup>-</sup>). GABA<sub>A</sub> receptors are also widely expressed in nonneuronal cells in organs outside the central nervous system, including the lung, pancreas, and ovaries.<sup>1</sup> Recent studies,<sup>2,3</sup> including one of ours,<sup>4</sup> showed that rodent alveolar type II (ATII) epithelial cells express GABA<sub>A</sub> receptors. ATII cells also produce GABA,<sup>3</sup> and stimulation of this autocrine GABA–GABA<sub>A</sub> receptor signaling system causes an outward chloride flux and membrane depolarization in these cells.<sup>4</sup>

A variety of inhaled and injectable general anesthetics, including the volatile anesthetic isoflurane, increases the activity of GABA<sub>A</sub> receptors in neurons.<sup>5,6</sup> The increase in GABA<sub>A</sub> receptor activity contributes to the profound neurodepressive properties of these drugs.<sup>7</sup> When administered to patients, volatile anesthetics rapidly diffuse across the alveolar epithelium en route to the brain. We postulated that inhaled anesthetics alter the function of ATII cells, at least in part, by upregulating the activity of GABA<sub>A</sub> receptors. ATII cells regulate innate pulmonary immune responses by producing the pulmonary collectin surfactant protein-A,<sup>8</sup> as well as proinflammatory factors such as cyclooxygenase-2 (COX-2)<sup>9</sup> and cytokines.<sup>10</sup> Stimulating GABA<sub>A</sub> receptor<sup>5</sup> decreases the secretion of cytokines from lung epithelial cells.<sup>11</sup> Isoflurane also reduces the release of cytokines from ATII cells<sup>10</sup> and decreases cytokine-augmented expression of surfactant proteins in these cells.<sup>12</sup> Animal models have indicated that these actions of isoflurane may protect the lung from infection-related lung injuries.<sup>13,14</sup>

The current study was undertaken to determine whether isoflurane increases the function of GABA<sub>A</sub> receptors in human ATII cells and, if so, whether isoflurane alters the expression of COX-2 *via* regulation of GABA<sub>A</sub> receptors. The prototypic inhaled anesthetic isoflurane was selected for most of the studies reported here because it is widely used in clinical practice and because the effects of this inhaled anesthetic in the lungs have been previously characterized.

## Materials and Methods

### Human Lung Sections

Human lung sections were obtained from the University of British Columbia James Hogg Research Centre tissue bank. Use of these lung sections was approved by the iCAPTURE Centre of St. Paul's Hospital, Vancouver, Canada. The procedures used to obtain human lung tissues and to prepare lung sections for studies such as this one have been described.<sup>15,16</sup> Briefly, the lung tissues were obtained from patients who underwent lung resection for treatment of tumors at St. Paul's Hospital. Each resected lung was inflated with a solution containing 50% cryomatrix solution (Shandon, Pittsburgh, PA), rapidly frozen solid in liquid nitrogen vapor, cut into 2-cm-thick transverse slices, and sampled with a power-driven hole saw to obtain tissue cores 1.5 cm in diameter and 2 cm in length, which were subsequently stored at -80°C. Sections of lung without evidence of cancer were selected

for this study, cut into 10-μm slices, and mounted on glass slides.

### Cell Cultures

A549 cells, a line of cells derived from human ATII cells,<sup>17</sup> were propagated as previously described.<sup>18</sup> Briefly, stock cultures of A549 cells were maintained at 4-day passage intervals, and individual cells were used for no more than 15 passages. For experimental tests, cells were removed from monolayer stock cultures with a trypsin–EDTA solution (0.05% trypsin, 0.481 mM Na-EDTA, Life Technologies, Carlsbad, CA), counted with a hemocytometer, and plated at a density of about 1 × 10<sup>5</sup> cells/ml in 35-mm tissue culture dishes or on glass coverslips in Dulbecco's modified Eagle medium (Life Technologies) supplemented with 10% fetal calf serum. The A549 cells were incubated at 37°C in a humidified atmosphere of 5% CO<sub>2</sub> and were used for immunocytochemical and/or electrophysiologic studies 24–36 h after plating.

### Immunofluorescent Staining and Confocal Microscopy

The expression of GABA<sub>A</sub> receptor subunits in lung tissues and A549 cells was studied by immunofluorescence staining. GABA<sub>A</sub> receptors are hetero-pentamers made up of combinations of 19 different subunits.<sup>19</sup> In the current study, we examined the expression of five specific subunits (α5, β2, β3, δ, and π), for two reasons: first, our polymerase chain reaction assays detected abundant messenger RNAs for the α5, β3, δ, and π subunits in A549 cells<sup>4</sup> and second, the functional GABA<sub>A</sub> receptor pentamers are often composed of two α and two β subunits and one of the other subunits.<sup>20</sup> As previously described,<sup>4</sup> paraffin sections of mouse lung tissue were deparaffinized with xylene and then hydrated sequentially in 100, 95, and 70% ethanol. Epitopes were unmasked by heating the tissue sections in citrate buffer at pH 6 in a microwave. The tissues were permeabilized with 0.1% Triton X-100 and blocked with 10% normal serum for 1 h. The lung tissue sections were incubated overnight with primary antibodies for diverse GABA<sub>A</sub> receptor subunits, including antibody for the α2 subunit (Alomone Labs, Jerusalem, Israel, 1:100 dilution) and antibody for the π subunit (Abcam, Cambridge, MA, 4 μg/ml). These subunits were specifically studied because the minimal requirement to produce a GABA-gated ion channel is the inclusion of both α and β subunits<sup>21</sup> and because a high level of messenger RNA encoding the π subunit has been identified in rat ATII cells.<sup>2,3</sup> The ATII cells in lung sections were identified by immunostaining presurfactant protein C using an antipresurfactant protein C antibody (Santa Cruz Biotechnology, Santa Cruz, CA, 1:200 dilution). The lung sections were subsequently incubated with Cy3-conjugated or fluorescein isothiocyanate-conjugated secondary antibodies (Jackson ImmunoResearch Laboratories, West Grove, PA). As a negative control, to verify stain specificity, immunoglobulin G (Santa Cruz Biotechnology) was used to replace primary antibodies. Immunocytochemistry of

cultured cells was performed as previously described,<sup>22–24</sup> using antibody against GABA<sub>A</sub> receptor  $\beta$ 2 and  $\beta$ 3 subunits (Millipore, Temecula, CA, 1:100 dilution) and an antibody against COX-2 (Santa Cruz Biotechnology, 1:200 dilution). A fluorescein isothiocyanate-conjugated antibody for pan-cytokeratin (Sigma, Oakville, Ontario, Canada, 1:100 dilution) was used to visualize the A549 cells.

Immunostained lung tissue and A549 cells were studied through an inverted Zeiss microscope using the Zeiss LSM program (Carl Zeiss Canada Ltd., Toronto, Ontario, Canada). The detection threshold for immunofluorescence of the studied protein was set just below the negative control. The microscope image fields were randomly selected by arbitrarily moving the sample, and multiple confocal microscopy images (12–25 images per group) were obtained and saved for imaging analysis, as previously described.<sup>22–24</sup> Briefly, the fluorescence signal was adjusted with Image-J software (National Institutes of Health, Bethesda, MD) such that the fluorescence-stained cellular structures appeared black on a white background. The total area of staining per image field was collected for statistical analysis.

### Immunoblotting

To demonstrate the expression of GABA<sub>A</sub> receptor subunit protein in human-derived ATII cells, lysates of A549 cells were prepared and then used for immunoblotting assays with primary antibodies against specific subunits of GABA<sub>A</sub> receptors. The general procedures of Western blotting were the same as previously described.<sup>22</sup> Briefly, A549 cells were lysed in ice-cold phosphate-buffered saline with 1% Triton X-100 and 0.5% sodium deoxycholate supplemented with protease inhibitors. The primary antibodies were purchased from the following companies: anti-GABA<sub>A</sub> receptor  $\alpha$ 5 and  $\delta$  subunits from Millipore (dilution of 1:1000 and 1:1500), respectively; anti-GABA<sub>A</sub> receptor  $\beta$ 2 and  $\beta$ 3 subunits from ABR Affinity BioReagents (Golden, CO, 1:1000 dilution); anti-GABA<sub>A</sub> receptor  $\pi$  subunit from Abcam (1:2000 dilution); anti-COX-2 from Santa Cruz Biotechnology (1:1000 dilution); and anti- $\beta$ -actin from Sigma (1:5000 dilution). Prepared solutions were incubated overnight at 4°C. Lysate (containing 40  $\mu$ g protein) of mouse cerebral cortex was used as the positive control for blotting assays of the  $\alpha$ 5,  $\beta$ 2,  $\beta$ 3, and  $\delta$  subunits, and the lysate (containing 50  $\mu$ g protein) of Jurkat cells (an immortalized line of T lymphocytes) was used as the positive control for blotting assays of the  $\pi$  subunit.

### Solutions of Volatile Anesthetics

A fresh solution of isoflurane (Abbott Laboratories Ltd., Chicago, IL) was prepared on each experimental day as previously described.<sup>25</sup> Specifically, liquid isoflurane was added to extracellular solution (ECS), and the solution was stored in a tightly sealed glass container at room temperature (22–24°C) for at least 2 h. Under these conditions, the ECS, saturated with isoflurane, formed an upper layer, while liquid isoflurane stayed below the ECS. The isoflurane-saturated ECS was sampled

and quickly diluted in regular ECS at the following dilutions: 1:1000, 1:333, 1:100, 1:33, and 1:10. We previously measured the concentration of isoflurane in the perfusion barrels and found that the final concentrations of isoflurane in test solutions containing 0.10, 0.33, 1.0, 3.33, and 10.0% of isoflurane-saturated ECS were about 2.5, 8.3, 25, 83, and 250  $\mu$ M, respectively.<sup>25</sup> All test solutions containing isoflurane were stored in sealed glass containers until used. Solutions of sevoflurane (Abbott Laboratories Ltd.) were prepared according to the procedure described earlier for isoflurane solutions.

### Electrophysiologic Recording

After removal of the culture media, A549 cells were rinsed with ECS containing (in mM) 155 NaCl, 1.3 CaCl<sub>2</sub>, 5.4 KCl, 25 HEPES, and 33 glucose, at pH 7.4 and osmolarity about 315 mOsm. An Axopatch-1D amplifier (Axon Instruments Inc., Foster City, CA) was used to make patch recordings at room temperature (22–24°C). The patch electrodes were filled with intracellular solution containing (in mM) 155 KCl, 15 KOH, 10 HEPES, 2 MgCl<sub>2</sub>, 1 CaCl<sub>2</sub>, and 2 tetraethylammonium, at pH 7.35 and osmolarity about 315 mOsm. The A549 cells were continuously bathed in regular ECS delivered through a multibarrel perfusion system. All solutions flowed at a speed of about 5 ml/min through silicone tubing that connected the glass solution reservoirs and the perfusion barrels, which were directed to the test cells. To reduce the evaporative loss of volatile anesthetics, any solution reservoir containing a volatile anesthetic was capped and the silicone tube clamped before the solution was applied. Solutions were rapidly applied to the test cell for a short duration by switching the perfusion barrels *via* a computer-controlled device (SF-77B, Warner Instruments LLC, Hamden, CT). To evaluate the potency of GABA for GABA<sub>A</sub> receptors in A549 cells, GABA at concentrations of 0.1–100  $\mu$ M was applied to the cells. In some experiments, the GABA<sub>A</sub> receptor antagonist bicuculline and/or picrotoxin was also applied to the cells. To study the effect of isoflurane on the activity of GABA<sub>A</sub> receptors, this anesthetic was co-applied during application of GABA. To study the effect of sevoflurane on the activity of GABA<sub>A</sub> receptors, GABA was co-applied during application of sevoflurane.

With the system in voltage clamp mode (with the holding potential set at –60 mV), whole cell patch clamp recordings were performed. Cells showing “leaky current” (>20 pA) were excluded from testing. GABA-induced currents were acquired online using pCLAMP software (Axon Instruments) and a Digidata 1322A or 1200 digitizer (Axon Instruments). The electrical signals were filtered (1 kHz) and saved in a computerized database. The digitized data were analyzed offline using Clampfit software (Axon Instruments), as previously described.<sup>4,24,26,27</sup> To construct the GABA dose–response plots for currents recorded in A549 cells, the peak of GABA-evoked current was measured. For analyzing the effect of isoflurane on GABA-induced currents, the averaged amplitude of GABA-evoked current



elicited during application of isoflurane was normalized to that recorded 20 ms before application of isoflurane.

### **Treating Cultured A549 Cells with Muscimol and Isoflurane**

At 24 h after plating, A549 cells grown in culture dishes or on glass coverslips were treated with muscimol (30  $\mu\text{M}$ ), isoflurane, or isoflurane plus bicuculline (50  $\mu\text{M}$ ) for 4 h. For isoflurane treatment, isoflurane-saturated Dulbecco's modified Eagle medium was prepared on the day of use at room temperature (22–24°C) and stored in a tightly sealed glass container. Dulbecco's modified Eagle medium (2 ml) containing 250  $\mu\text{M}$  isoflurane was added to each cell culture dish every 30 min over a period of 3.5 h (*i.e.*, eight times). All A549 cells were used 4 h after the treatment.

### **Trypan Blue Exclusion Assay**

Trypan blue staining was used to examine cell viability. Briefly, A549 cells cultured in 35-mm dishes were incubated, for 4 h, in control culture medium, in medium containing 250  $\mu\text{M}$  of isoflurane, or in isoflurane-saturated medium. The cells were then incubated with control medium containing 0.2% trypan blue (Sigma) for 10 min. After two washings with phosphate-buffered saline, the cells were fixed with 4% paraformaldehyde for 10 min at room temperature. Multiple pictures of randomly selected trypan blue-treated cells in each dish were obtained under a Zeiss inverse microscope with 40 $\times$  lens. The number of cells stained with trypan blue was counted and expressed as a percentage of all cells in the image field (*i.e.*, 150–400 cells).

### **Statistical Analysis**

Statistical analyses were performed with SigmaPlot software (Systat Software Inc., Chicago, IL). For analyzing GABA<sub>A</sub> receptor activity, the peak amplitude of GABA-induced currents was normalized to either the maximum response or the control current. To determine the half-maximal effective concentration ( $\text{EC}_{50}$ ) of GABA-induced currents in A549 cells, the normalized amplitude of GABA-induced current was plotted against the concentration of GABA, and the data were fitted with the equation  $f = (a/1) + (x/x_0)^b$ . Group data (two tailed) were examined with paired or unpaired Student *t* tests, as appropriate. All data are expressed as mean  $\pm$  SD. *P* values less than 0.05 were considered significant.

## **Results**

### **GABA<sub>A</sub> Receptors Are Expressed in Mouse and Human ATII Cells**

The immunohistochemical assays showed that ATII cells stained positively for presurfactant protein C were located in the alveolar area of mouse lungs (fig. 1A) and human lungs (fig. 1B), as described previously.<sup>28</sup> The ATII cells were immunoreactive to antibodies to the  $\alpha 2$  and  $\pi$  subunits of the GABA<sub>A</sub> receptor (fig. 1, A and B), as well as to an

antibody selective for both the  $\beta 2$  and  $\beta 3$  subunits (data not shown). Next, immunocytochemistry was performed on the human ATII cell line A549, under nonpermeabilized conditions, to confirm the expression of GABA<sub>A</sub> receptor subunits by these cells and to determine whether the receptors are expressed on the plasma membrane. Specifically, A549 cells were immunostained with the antibody directed against both the  $\beta 2$  and  $\beta 3$  subunits, and immunofluorescent clusters of  $\beta 2/\beta 3$  subunits were identified on the cell surface (fig. 1C). Immunoblotting of lysates of A549 cells revealed protein bands that corresponded to  $\alpha 5$ ,  $\beta 2$ ,  $\beta 3$ ,  $\delta$ , and  $\pi$  subunits of the GABA<sub>A</sub> receptor (fig. 1D).

### **GABA<sub>A</sub> Receptors in A549 Cells Have a High Sensitivity to GABA**

To study the functional properties of GABA<sub>A</sub> receptors in ATII cells, whole cell voltage clamp recordings were performed in A549 cells. The application of GABA (0.1–100  $\mu\text{M}$ ) evoked an inward current that increased in amplitude with increasing concentrations of GABA (fig. 2A-1). The threshold GABA concentration that evoked a detectable current was approximately 0.1–0.3  $\mu\text{M}$  ( $n = 6$ ). The peak amplitude of the current generated by 100  $\mu\text{M}$  GABA was  $117 \pm 38$  pA ( $n = 9$ ). The  $\text{EC}_{50}$  and the maximal effective concentration ( $\text{EC}_{\text{Max}}$ ) of GABA, estimated from curves fitted to the concentration–response plot for GABA-evoked currents in A549 cells ( $n = 6$ ), were  $2.45 \pm 0.28$  and  $32.66 \pm 6.32$   $\mu\text{M}$ , respectively (fig. 2A-2). Currents evoked by GABA concentrations above 3.0  $\mu\text{M}$  peaked rapidly and then decayed or “desensitized” to a steady state. The peak current activated by 3  $\mu\text{M}$  GABA was  $84.5 \pm 3.6\%$  of that evoked by 100  $\mu\text{M}$  GABA ( $n = 6$ ). The ratio of peak to steady state of the current evoked by 3  $\mu\text{M}$  GABA was  $0.62 \pm 0.02$  ( $n = 8$ ), similar to that of the current evoked by 100  $\mu\text{M}$  GABA ( $0.61 \pm 0.04$ ,  $n = 9$ ).

Surprisingly, the current evoked by 30  $\mu\text{M}$  GABA was only partially inhibited by the GABA<sub>A</sub> receptor antagonist bicuculline. Specifically, the amplitude of current evoked by 30  $\mu\text{M}$  GABA in the absence and presence of a typically saturating concentration of bicuculline (100  $\mu\text{M}$ ) was  $80 \pm 7.3$  pA ( $n = 7$ ) and  $27 \pm 4.1$  pA ( $n = 7$ ), respectively (fig. 2, B-1 and B-2). Higher concentrations of bicuculline did not further reduce the current. In contrast, the current evoked by 30  $\mu\text{M}$  GABA was strongly inhibited by another GABA<sub>A</sub> receptor antagonist, picrotoxin (50  $\mu\text{M}$ ; fig. 2B-2). This result suggests that the pharmacologic properties of GABA<sub>A</sub> receptors in ATII cells differ significantly from those of GABA<sub>A</sub> receptors in most neurons,<sup>29</sup> as the receptors in neurons are highly sensitive to both bicuculline and picrotoxin when studied under identical recording conditions.<sup>29</sup>

### **Isoflurane Enhances GABA<sub>A</sub> Receptor-mediated Current in ATII Cells**

Next, we investigated whether isoflurane modulates the activity of GABA<sub>A</sub> receptors in ATII cells. Specifically, we tested the effects of isoflurane (2.5–250  $\mu\text{M}$ ) on the currents

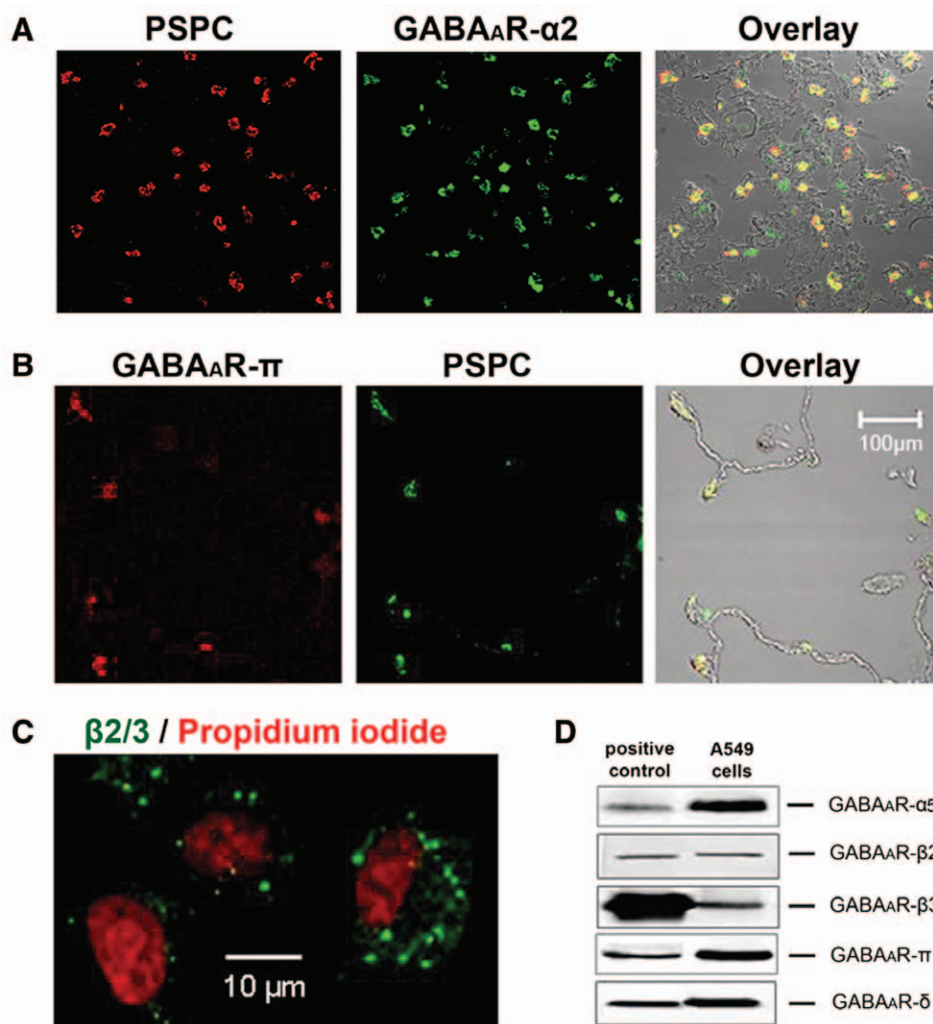

**Fig. 1.**  $\gamma$ -Aminobutyric acid type-A (GABA<sub>A</sub>) receptor is expressed in alveolar type II (ATII) cells. (A) Typical images of double staining of mouse lung tissues for presurfactant protein C (PSPC; red) and the  $\alpha 2$  subunit of GABA<sub>A</sub> receptor (green). (B) Representative images of double staining of human lung tissue for PSPC (green) and the  $\pi$  subunit of GABA<sub>A</sub> receptor (red). The images in A and B are at the same magnification. (C) Illustrative immunofluorescent image of  $\beta 2$  and/or  $\beta 3$  subunits of GABA<sub>A</sub> receptor (green) in ATII cells under nonpermeabilized conditions, which reveals the presence of GABA<sub>A</sub> receptor in the cell membrane surface. Propidium iodide (red) was used to stain the cell nuclei. (D) Immunoblots showing expression of five GABA<sub>A</sub> receptor subunit proteins in A549 cells. Lysate of mouse cortex was used as a positive control for GABA<sub>A</sub> receptor subunits, except the  $\pi$  subunit, for which the positive control was lysate of Jurkat cells.

evoked by 0.5, 10, and 100  $\mu$ M GABA ( $I_{\text{GABA}0.5}$ ,  $I_{\text{GABA}10}$ , and  $I_{\text{GABA}100}$ , respectively). As depicted in figure 3, A and B, isoflurane enhanced the amplitude of  $I_{\text{GABA}0.5}$  and  $I_{\text{GABA}10}$  in a dose-dependent manner, with similar  $\text{EC}_{50}$  values ( $\text{EC}_{50}$  of isoflurane on  $I_{\text{GABA}0.5}$ :  $16.2 \pm 2.9 \mu\text{M}$ ,  $n = 7$  cells;  $\text{EC}_{50}$  of isoflurane on  $I_{\text{GABA}10}$ :  $19.66 \pm 5.4 \mu\text{M}$ ,  $n = 6$  cells;  $P = 0.11$ ; fig. 3B). However, the maximum effect of isoflurane on  $I_{\text{GABA}0.5}$  was significantly greater than its maximum effect on  $I_{\text{GABA}10}$  ( $I_{\text{GABA}0.5}$ :  $2.4 \pm 0.6$  times of the amplitude of control current,  $n = 7$  cells;  $I_{\text{GABA}10}$ :  $1.6 \pm 0.2$  times of the amplitude of control current,  $n = 6$  cells;  $P < 0.001$ ; fig. 3B). Notably, a remarkable “after response” of the GABA-evoked current ( $I_{\text{GABA}0.5}$  or  $I_{\text{GABA}10}$ ) was observed when a high concentration (83 or 250  $\mu\text{M}$ ) of isoflurane was applied to the cell

(fig. 3A, lowest row, and C-1). Moreover, high concentrations of isoflurane actually decreased the amplitude of  $I_{\text{GABA}100}$ , and terminating the application of isoflurane elicited a large and long-lasting rebound current in some cells (fig. 3C-2). Notably, isoflurane applied alone did not evoke any current (data not shown).

To examine whether other volatile anesthetics also regulate the function of GABA<sub>A</sub> receptors in ATII cells, we tested the effect of sevoflurane on GABA-evoked currents in A549 cells. Sevoflurane displayed a comparable effect on the activity of GABA<sub>A</sub> receptors in A549 cells. Specifically, at a low concentration (1:1000 dilution), sevoflurane enhanced the current induced by 10  $\mu\text{M}$  GABA (fig. 3D-1), but at a high concentration (1:10 dilution), it inhibited the current (fig.

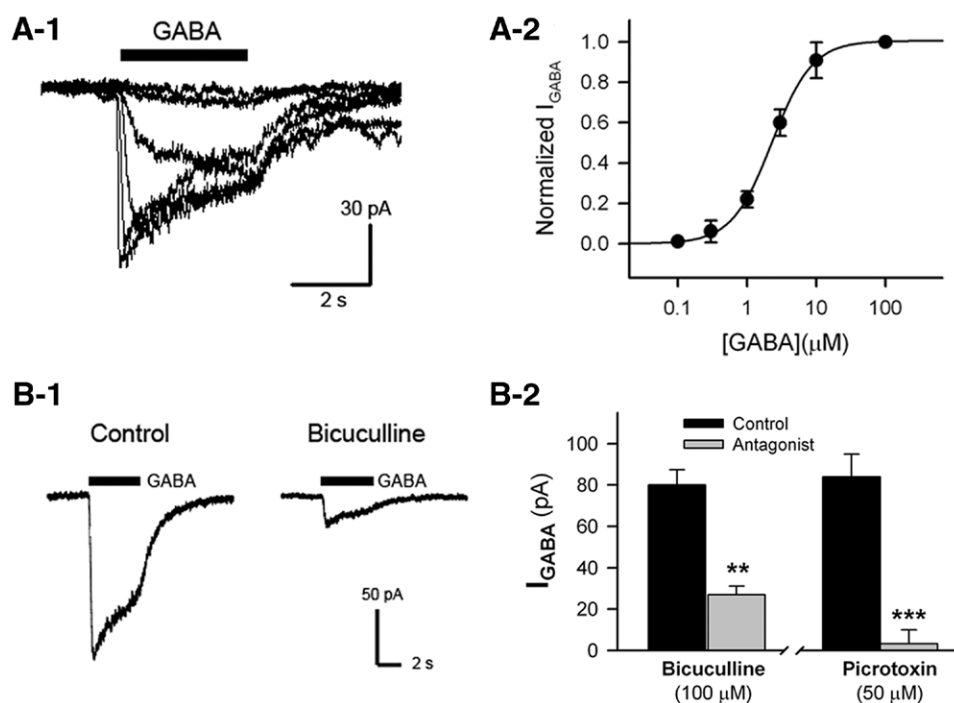

**Fig. 2.**  $\gamma$ -Aminobutyric acid type-A (GABA<sub>A</sub>) receptor in A549 cells displays unique functional features. (A) Patch clamp recordings showed that GABA (0.1–100  $\mu M$ ) evoked transmembrane currents in A549 cells in a dose-dependent manner (A-1), with  $EC_{50}$  of  $2.45 \pm 0.28 \mu M$  and  $EC_{Max}$  of  $32.66 \pm 6.32 \mu M$  (A-2). (B) The current induced by 30  $\mu M$  was largely inhibited by 100  $\mu M$  bicuculline (B-1 and B-2; control:  $80 \pm 7.3$  pA,  $n = 7$ ; antagonist:  $27 \pm 4.1$  pA,  $n = 7$ ;  $**P < 0.01$ ) and were almost fully blocked by 50  $\mu M$  picrotoxin (B-2; control:  $84 \pm 11.0$  pA,  $n = 5$ ; antagonist:  $3.3 \pm 6.7$  pA,  $n = 5$ ;  $***P < 0.001$ ).

3D-2). Taken together, these results indicate that volatile anesthetics modify the activity of atypical GABA<sub>A</sub> receptors in ATII cells in a complex fashion, as they both potentiate and inhibit the current, depending on the activity levels of the receptors.

#### Isoflurane Regulates COX-2 Expression in A549 cells via Modulation of GABA<sub>A</sub> Receptors

Given that ATII cells express GABA<sub>A</sub> receptors that are highly sensitive to isoflurane and sevoflurane, we next sought to determine whether an anesthetic, through upregulation of GABA<sub>A</sub> receptor activity, would modify a key inflammation-related function in these cells. Immunohistochemistry combined with confocal microscopy revealed the immunoreactivity of COX-2 in surfactant-expressing alveolar cells of control mouse lungs (fig. 4A), which indicates that the gene encoding for COX-2 is constitutively expressed in ATII cells. Similarly, immunoreactivity of COX-2 was detected in ATII cells of human lungs (fig. 4B) and in control A549 cells, with high-magnification microscopic images displaying immunoreactive clusters of COX-2 in the cytosol of these cultured cells (fig. 5, A-1 to A-4, with comparison to negative control in fig. 5A-5). Analysis of the number of COX-2 clusters *via* Image-J software (fig. 5B) revealed significantly fewer clusters of COX-2 in A549 cells treated with the GABA<sub>A</sub> receptor agonist muscimol (30  $\mu M$ ; fig. 5, A-2 and C) relative to control. This finding indicates that stimulation of GABA<sub>A</sub> receptors in ATII cells inhibits COX-2 expression.

Autocrine GABA<sub>A</sub> receptors in ATII cells, including A549 cells, are constantly activated by endogenously secreted GABA.<sup>2,3</sup> We treated A549 cells with isoflurane (initial concentration 250  $\mu M$ ) to examine whether this anesthetic affects COX-2 expression by increasing autocrine GABA<sub>A</sub> receptor activity. Immunocytochemistry showed that isoflurane treatment decreased the immunoreactivity of COX-2 in A549 cells (fig. 5, A-3 and C). The isoflurane-induced reduction in COX-2 expression was partially reversed by co-treating the A549 cells with bicuculline (50  $\mu M$ ; fig. 5, A-4 and C). The inhibitory effects of both muscimol and isoflurane on COX-2 expression in A549 cells were confirmed with immunoblotting assays (fig. 5D). Exposure of neuronal cells to a high concentration of isoflurane causes apoptosis.<sup>30</sup> Indeed, almost all of the A549 cells treated with a high concentration of isoflurane (initial concentration 2500  $\mu M$ ) stained for trypan blue ( $95.1 \pm 3.9\%$ ; fig. 5E, Iso-S). However, it is unlikely that the inhibition of COX-2 expression by a lower concentration of isoflurane was the result of a cytotoxic effect on the cells, given that very few of the A549 cells treated with the test concentration of isoflurane (initial concentration 250  $\mu M$ ) stained for trypan blue ( $1.76 \pm 0.21\%$ ; fig. 5E, Iso-250), a result that was not significantly different from that for control cells ( $0.12 \pm 0.2\%$ ; fig. 5E, Ctrl).

#### Discussion

To the best of our knowledge, this is the first study to show that the activity of GABA<sub>A</sub> receptors in ATII cells is

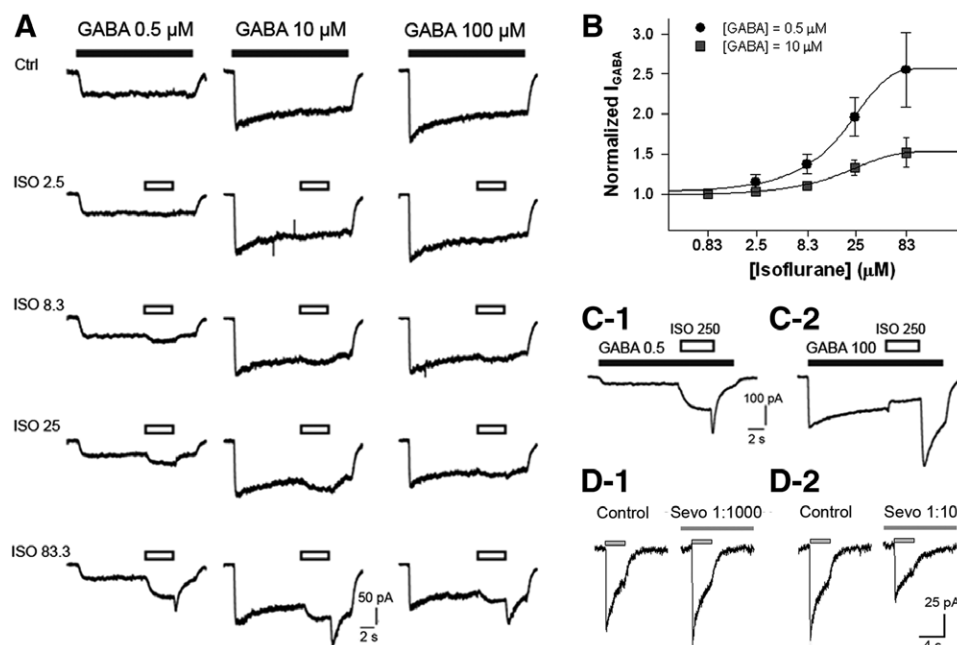

**Fig. 3.** Isoflurane regulates  $\gamma$ -aminobutyric acid type-A ( $GABA_A$ ) receptor activity through a complex mechanism. (A) Traces of GABA-evoked current ( $I_{GABA}$ ) recorded in the same A549 cell depicts the complex effects of various concentrations of isoflurane (ISO; concentrations given in  $\mu M$ ) on  $GABA_A$  receptor activity evoked by low (0.5  $\mu M$ ), moderate (10  $\mu M$ ), and high (100  $\mu M$ ) concentrations of GABA. Isoflurane dose dependently enhanced  $I_{GABA}$ , with lesser degree of enhancement on the current evoked by a higher concentration of GABA. When the isoflurane concentration was high, termination of isoflurane caused a rebound of  $I_{GABA}$ . (B) Plots show the degree of dose-dependent enhancement by different concentrations of isoflurane (0.83–83.3  $\mu M$ ) of  $I_{GABA}$  evoked by 0.5  $\mu M$  GABA ( $I_{GABA,0.5}$ , circle) or 10  $\mu M$  GABA ( $I_{GABA,10}$ , square). The largest amplitude of  $I_{GABA}$  in the presence of isoflurane was normalized to the amplitude of  $I_{GABA}$  recorded 20 ms before application of isoflurane. (C) Shown are characteristic traces of  $I_{GABA}$  recorded from the same cell, illustrating that 250  $\mu M$  isoflurane enhanced the current evoked by 0.5  $\mu M$  GABA (C-1) but inhibited the current evoked by 100  $\mu M$  GABA (C-2). (D) Shown are traces of  $I_{GABA}$  (evoked by 10  $\mu M$  GABA) recorded from the same cell, illustrating the effect of sevoflurane on  $I_{GABA}$ . GABA was co-applied during perfusion of sevoflurane. Note that low concentration (1:1000) of sevoflurane enhanced  $I_{GABA}$  (D-1) but high concentration (1:10) of sevoflurane decreased  $I_{GABA}$  (D-2).

upregulated by an inhaled anesthetic. Specifically, the study shows that (1) ATII cells in human lungs express  $GABA_A$  receptors; (2)  $GABA_A$  receptors in A549 cells exhibit a high affinity for GABA and relative resistance to inhibition by bicuculline (compared with  $GABA_A$  receptors in neurons); (3) isoflurane and sevoflurane at clinically relevant concentrations increase the activity of  $GABA_A$  receptors in ATII cells in a complex manner; and (4) isoflurane decreases expression of COX-2 in ATII cells, an effect that is mediated, at least in part, *via*  $GABA_A$  receptors.

#### Human ATII Cells Express Functional $GABA_A$ Receptors that Have Unique Properties

ATII cells in the alveolar areas of human and rodent lungs expressed subunits of the  $GABA_A$  receptor (fig. 1, A and B). The expression of various  $GABA_A$  receptor subunits in A549 cells was confirmed by immunoblots (fig. 1, C and D). More importantly, these  $GABA_A$  receptor subunits formed functional channels in A549 cells, as evidenced by the picrotoxin-sensitive GABA-evoked currents in the cells (fig. 2).

Our results suggest that the pharmacologic properties of  $GABA_A$  receptors in ATII cells differ fundamentally from those expressed in neurons in several important respects.

First, the  $EC_{50}$  and  $EC_{Max}$  of GABA in A549 cells in the current study were approximately 2.5 and 32  $\mu M$ , respectively (fig. 2A-2), whereas the  $EC_{50}$  and  $EC_{Max}$  of GABA in central neurons are much higher: 19 and 600  $\mu M$ , respectively.<sup>29</sup> These differences indicate that the  $GABA_A$  receptors in ATII cells have a high affinity for their endogenous ligands. The high affinity of  $GABA_A$  receptors in A549 cells likely results from the unique subunit composition of these receptors. In particular,  $\pi$  subunits are abundant in ATII cells<sup>3</sup> but are rarely expressed in neurons.<sup>31</sup> Receptors containing the  $\pi$  subunit typically display a higher affinity for GABA than receptors without this subunit.<sup>32</sup>

Second, ATII cells express glutamic acid decarboxylase, a key enzyme involved in the synthesis of GABA.<sup>2,3</sup> It has been postulated that these cells are the primary source of GABA in the alveoli and that  $GABA_A$  receptors localized to the apical membrane of alveolar epithelia are activated by GABA in an autocrine fashion.<sup>3</sup> ATII cells do not generate action potentials; and are devoid of any mechanisms that would facilitate the synchronized release of large amounts of GABA into the alveolus, as occurs at synapses in the central nervous system. The high affinity for GABA of the  $GABA_A$  receptors in ATII cells would allow these receptors to sense the



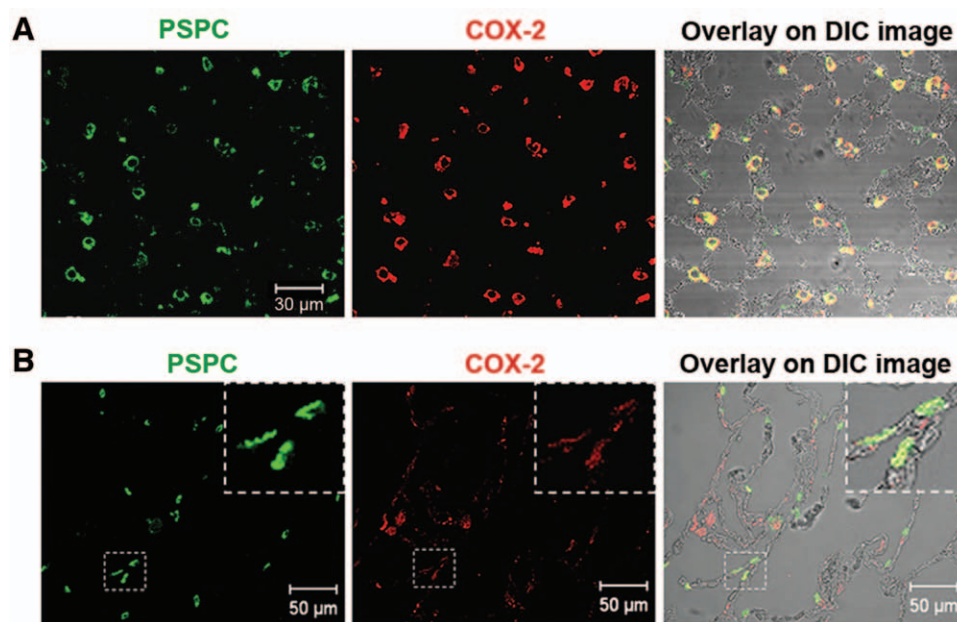

**Fig. 4.** Cyclooxygenase 2 (COX-2) is constitutively expressed in alveolar type II (ATII) cells. (A) Images depict double staining of control mouse lung tissues for the ATII cell marker presurfactant protein C (PSPC, green) and COX-2 (red). (B) Shown are images of immunofluorescent double staining of human lung slices for PSPC (green) and COX-2 (red), demonstrating the expression of COX-2 in ATII cells. Inset in the corner of each panel shows enlarged image of the area marked in the main image. DIC = differential interference contrast.

low ambient concentration of endogenous GABA. A hypothetical scheme by which GABA<sub>A</sub> receptors are activated in ATII cells is shown in figure 6. Here, we propose that GABA molecules released from ATII cells disperse into the alveolar liquid and spread over the vast surface area of the alveolus. It is conceivable that a low concentration of GABA is continually present in the alveolar surface liquid, causing persistent activation of GABA<sub>A</sub> receptors in the ATII cells. The physiological role of this GABA<sub>A</sub> receptor-mediated tonic current is now being studied, but it has already been reported that GABA–GABA<sub>A</sub> receptor signaling in ATII cells regulates alveolar water–electrolyte homeostasis.<sup>3</sup>

In addition, our results revealed that GABA<sub>A</sub> receptors in ATII cells were partially inhibited by high concentrations of bicuculline but were effectively blocked by picrotoxin (fig. 2B). Bicuculline-insensitive GABA<sub>C</sub> receptors were previously described as pentameric constructs containing only  $\rho$  subunits. These receptors could be effectively blocked by picrotoxin but not bicuculline.<sup>33</sup> The  $\rho$  subunits may also be expressed heterogeneously in cells, forming heterooligomers with other GABA<sub>A</sub> receptor subunits.<sup>34,35</sup> As such, the  $\rho 1$ – $\rho 3$  subunits have been classified as GABA<sub>A</sub> receptor subunits.<sup>36,37</sup> The relative insensitivity to bicuculline of GABA<sub>A</sub> receptors in A549 cells raises the possibility that these receptors may include  $\rho$  subunits. Consistent with this suggestion, high levels of messenger RNA for the  $\rho 1$ – $\rho 3$  subunits have been identified in rat ATII cells.<sup>3</sup> Confirmation of the expression of  $\rho$  subunits in primary ATII cells of human lungs awaits further immunohistochemical assays with specific antibodies.

#### ***Isoflurane Modulates GABA<sub>A</sub> Receptor Activity in Lung ATII Cells***

Isoflurane had complex effects on the activity of GABA<sub>A</sub> receptors in ATII cells, as it both potentiated and inhibited the currents evoked by different concentrations of GABA. Such multifaceted effects of isoflurane exhibited several interesting features. First, the degree of enhancement by isoflurane of GABA-evoked currents decreased with increasing concentrations of GABA (fig. 3, A and B). Furthermore, high concentrations ( $\geq 250$   $\mu\text{M}$ ) of isoflurane inhibited the currents evoked by a high concentration of GABA (100  $\mu\text{M}$ ; fig. 3C-2). Terminating the administration of high-concentration isoflurane caused a marked rebound of the GABA-evoked currents (fig. 3C-2). The molecular mechanism underlying these complex effects of isoflurane on the activity of GABA<sub>A</sub> receptors in ATII cells awaits further investigation. In this regard, previous studies in neurons showed that high concentrations of GABA desensitize GABA<sub>A</sub> receptors.<sup>38</sup> Isoflurane inhibition of GABA-evoked currents may be secondary to an increase in desensitization of the receptors, as has been observed in neurons.<sup>39</sup>

The current study revealed that isoflurane at clinically relevant concentrations (8.3–83  $\mu\text{M}$ ) significantly facilitated GABA<sub>A</sub> receptor activity evoked by low concentrations of GABA (0.5 and 10  $\mu\text{M}$ ; fig. 3, A and B). As both the total alveolar surface and the corresponding total volume of alveolar liquid are very large, the concentration of endogenous GABA in the alveoli must be low. As illustrated in figure 6, we postulate that under *in vivo* conditions, GABA<sub>A</sub> receptors in ATII cells are constantly activated by the low concentration of GABA and that inhaled isoflurane promptly diffuses into



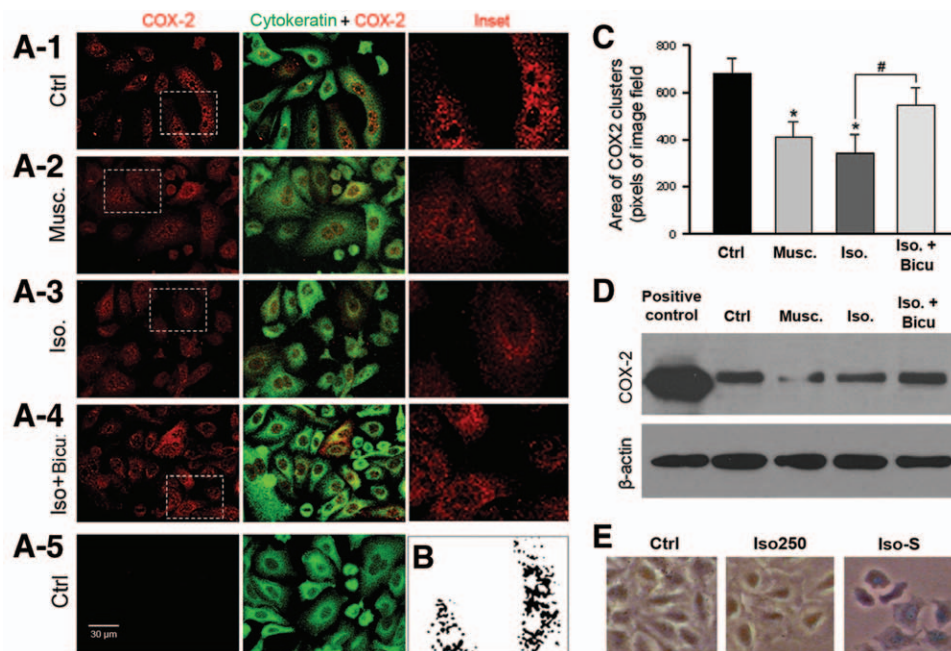

**Fig. 5.** Isoflurane suppresses the expression of cyclooxygenase 2 (COX-2) in A549 cells through upregulation of  $\gamma$ -aminobutyric acid receptor activity. (A) Double staining for COX-2 (red) and cytokeratin (green) in control A549 cells (A-1) and in A549 cells treated with muscimol (Musc., A-2), isoflurane (Iso., A-3), or isoflurane plus bicuculline (Iso.+Bicu., A-4). The left two panels in (A-5) display the negative control for COX-2 staining. (B) The black and white picture was converted from the image in the right-most column in (A-1) using Image-J software. Illustration of COX-2 immunofluorescent clusters (National Institutes of Health, Bethesda, MD), illustrating the immunofluorescent clusters of COX-2. (C) Plot summarizes the total area of COX-2 immunofluorescent clusters from control (Ctrl) A549 cells (Ctrl:  $684 \pm 65$  pixels,  $n = 12$  images) and A549 cells treated with muscimol (Musc.:  $412 \pm 66$  pixels,  $n = 12$  images), isoflurane (Iso.:  $343 \pm 81$  pixels,  $n = 12$  images), and isoflurane + bicuculline (Iso. + Bicu.:  $546 \pm 77$  pixels,  $n = 12$  images). \* $P < 0.05$  relative to control and # $P < 0.05$  among groups. (D) Immunoblots show the total protein of COX-2 in lysates of control A549 cells and A549 cells treated with muscimol, isoflurane, and isoflurane + bicuculline. (E) Illustrative images of trypan blue staining of A549 cells that were incubated for 4 h in control medium (Ctrl), or in the medium containing 250  $\mu$ M isoflurane (Iso250) or in the medium that was saturated with isoflurane (Iso-S). Following are the percentage of trypan blue-stained cells under different conditions. Ctrl:  $0.12 \pm 0.2\%$  ( $n = 1622$  cells in two dishes); Iso250:  $1.76 \pm 0.21\%$  ( $n = 5167$  cells in four dishes, in comparison to ctrl,  $P > 0.05$ ); Iso-S:  $95.1 \pm 3.9\%$  ( $n = 2287$  cells in three dishes, in comparison to control,  $P < 0.0001$ ).

the alveolar liquid, thus upregulating the activity of GABA<sub>A</sub> receptors in ATII cells. In the current study, the reported isoflurane concentrations were calculated on the basis of our previously reported measurement of isoflurane solutions.<sup>25</sup> As some isoflurane could evaporate from solutions during tests, the effect of isoflurane on GABA<sub>A</sub> receptor activity in A549 cells might be underestimated.

#### Isoflurane Downregulates COX-2 Expression via Modulation of GABA<sub>A</sub> Receptors

The expression of COX-2 increases rapidly in response to numerous inflammatory stimulants in a variety of cells. COX-2 is constitutively expressed in ATII cells, as evidenced by immunostaining of ATII cells isolated from human lungs (fig. 4) and A549 cells (fig. 5, A and D). COX-2 is a key enzyme involved in the production of prostaglandin E<sub>2</sub>,<sup>40,41</sup> a bioactive substance that is critical for various pulmonary functions. For example, it increases the production of surfactant in ATII cells.<sup>42</sup> Prostaglandin E<sub>2</sub> is also a potent mediator of lung inflammation.<sup>43,44</sup> Given that isoflurane decreases prostaglandin E<sub>2</sub> levels in the hypothalamus<sup>45</sup> and also suppresses

the biosynthesis of surfactant in the lung,<sup>12,46</sup> we postulate that isoflurane may inhibit COX-2 expression in ATII cells by modulating GABA<sub>A</sub> receptors. Indeed, our results from both the immunocytochemical and immunoblotting assays confirmed that treating A549 cells with either muscimol or isoflurane significantly reduced the expression of COX-2. The effect of isoflurane on COX-2 expression was largely prevented by bicuculline (fig. 5), which confirms that the effect of isoflurane was realized through GABA<sub>A</sub> receptors.

Available data have shown that the expression level of COX-2 in ATII cells changes rapidly in the presence of different concentrations of inflammatory cytokines.<sup>47</sup> In microglia, a decrease in COX-2 expression happens after diminishing calcium (Ca<sup>2+</sup>) entry through store-operated channels<sup>48</sup> (also known as Ca<sup>2+</sup> release-activated Ca<sup>2+</sup> [CRAC] channels). The opening of CRAC channels occurs in response to Ca<sup>2+</sup> store depletion following various stimulations. The activated CRAC channels allow Ca<sup>2+</sup> to enter down its concentration and electrical gradients, and the CRAC channel-mediated Ca<sup>2+</sup> current is characterized by a pattern of inwardly rectifying.<sup>49</sup> It is proposed that activating GABA<sub>A</sub> receptors

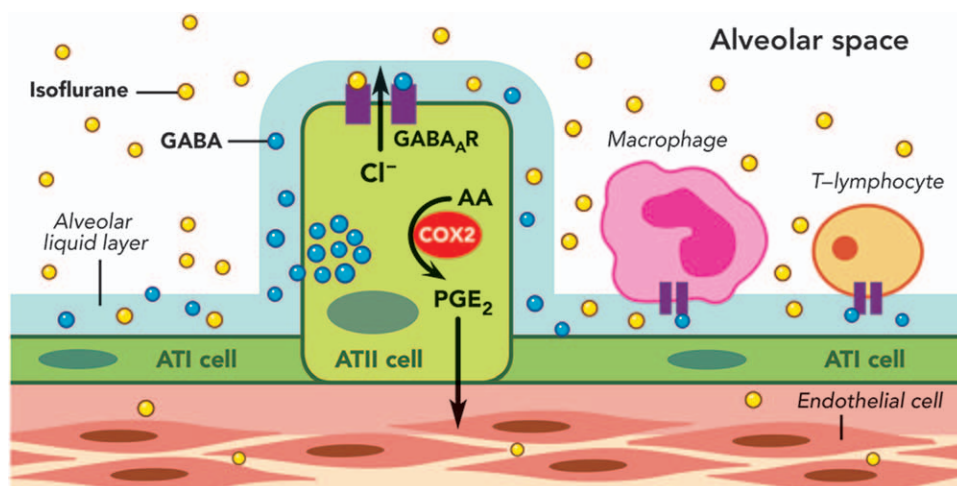

**Fig. 6.** Diagram of the proposed mechanism, by which isoflurane regulates autocrine  $\gamma$ -aminobutyric acid (GABA) signaling and cyclooxygenase 2 (COX-2) expression in alveolar type II (ATII) cells. ATI and ATII cells line the alveoli. COX-2 is constitutively expressed in ATII cells, possibly due to the persistent  $\text{Ca}^{2+}$  entry through  $\text{Ca}^{2+}$  release-activated calcium channel. The ATII cells express type-A GABA ( $\text{GABA}_A$ ) receptors and secrete GABA. GABA molecules diffuse into the alveolar liquid layer and stimulate  $\text{GABA}_A$  receptors in the apical membrane of ATII cells, generating autocrine signaling. This autocrine GABA signaling in the ATII cells leads to constant  $\text{Cl}^-$  efflux, hence membrane depolarization. Inhaled isoflurane diffuses into the alveolar liquid, where it allosterically enhances GABA receptor activity and hence increases membrane depolarization, consequently resulting in less  $\text{Ca}^{2+}$  entry through CRAC channels (because increased membrane depolarization decreases the electrical driving force for  $\text{Ca}^{2+}$ ) and decreased COX-2 expression. AA = arachidonic acid;  $\text{PGE}_2$  = prostaglandin E<sub>2</sub>.

in T-lymphocytes results in membrane depolarization that in turn decreases  $\text{Ca}^{2+}$  entry through CRAC channels<sup>50</sup> by reducing the electrical driving force for  $\text{Ca}^{2+}$ . CRAC channels are expressed in ATII cells.<sup>51</sup> Therefore, we hypothesize that isoflurane increases the activity of  $\text{GABA}_A$  receptors in ATII cells, causing more  $\text{Cl}^-$  efflux and greater membrane depolarization, which in turn leads to a decrease in the entry of  $\text{Ca}^{2+}$  through CRAC channel and hence a decline in COX-2 expression (fig. 6). Collectively, data from this study suggest that inhaled anesthetics, including isoflurane, produce antiinflammatory action in the lung, at least in part, by enhancing the activity of  $\text{GABA}_A$  receptors in ATII cells.

The authors thank Ella Czerwinska, M.Sc., Research Technician, Departments of Anesthesia and of Physiology, University of Toronto, Toronto, Ontario, Canada, for culturing cells for some studies; and Michael Jackson, Ph.D., Adjunct Professor, Department of Physiology and Pharmacology and Robarts Research Institute, University of Western Ontario, London, Ontario, Canada, for critically commenting on the manuscript.

## References

- Gladkevich A, Korf J, Hakobyan VP, Melkonyan KV: The peripheral GABAergic system as a target in endocrine disorders. *Auton Neurosci* 2006; 124:1–8
- Jin N, Narasaraaju T, Kolliputi N, Chen J, Liu L: Differential expression of GABA<sub>A</sub> receptor  $\alpha$  subunit in cultured rat alveolar epithelial cells. *Cell Tissue Res* 2005; 321:173–83
- Jin N, Kolliputi N, Gou D, Weng T, Liu L: A novel function of ionotropic gamma-aminobutyric acid receptors involving alveolar fluid homeostasis. *J Biol Chem* 2006; 281:36012–20
- Xiang YY, Wang S, Liu M, Hirota JA, Li J, Ju W, Fan Y, Kelly MM, Ye B, Orser B, O'Byrne PM, Inman MD, Yang X, Lu WY: A GABAergic system in airway epithelium is essential for mucus overproduction in asthma. *Nat Med* 2007; 13:862–7
- Longoni B, Demontis GC, Olsen RW: Enhancement of gamma-aminobutyric acidA receptor function and binding by the volatile anesthetic halothane. *J Pharmacol Exp Ther* 1993; 266:153–9
- Wu J, Harata N, Akaike N: Potentiation by sevoflurane of the gamma-aminobutyric acid-induced chloride current in acutely dissociated CA1 pyramidal neurones from rat hippocampus. *Br J Pharmacol* 1996; 119:1013–21
- Hemmings HC Jr, Akabas MH, Goldstein PA, Trudell JR, Orser BA, Harrison NL: Emerging molecular mechanisms of general anesthetic action. *Trends Pharmacol Sci* 2005; 26:503–10
- Froh D, Gonzales LW, Ballard PL: Secretion of surfactant protein A and phosphatidylcholine from type II cells of human fetal lung. *Am J Respir Cell Mol Biol* 1993; 8:556–61
- Li H, Bradbury JA, Dackor RT, Edin ML, Graves JP, DeGraff LM, Wang PM, Bortner CD, Maruoka S, Lih FB, Cook DN, Tomer KB, Jetten AM, Zeldin DC: Cyclooxygenase-2 regulates Th17 cell differentiation during allergic lung inflammation. *Am J Respir Crit Care Med* 2011; 184:37–49
- Giraud O, Molliex S, Rolland C, Lecon-Malas V, Desmonts JM, Aubier M, Dehoux M: Halogenated anesthetics reduce interleukin-1 $\beta$ -induced cytokine secretion by rat alveolar type II cells in primary culture. *ANESTHESIOLOGY* 2003; 98:74–81
- Fortis S, Spieth PM, Lu WY, Parotto M, Haitsma JJ, Slutsky AS, Zhong N, Mazer CD, Zhang H: Effects of anesthetic regimens on inflammatory responses in a rat model of acute lung injury. *Intensive Care Med* 2012; 38:1548–55
- Li YW, Yang TD, Liu QY, Tao J, Huang H: Isoflurane reduces the synthesis of surfactant-related protein a of alveolar type II cells injured by H<sub>2</sub>O<sub>2</sub>. *Drug Metabol Drug Interact* 2007; 22:187–94
- Voigtsberger S, Lachmann RA, Leutert AC, Schlappfer M, Booy C, Reyes L, Urner M, Schild J, Schimmer RC, Beck-Schimmer B: Sevoflurane ameliorates gas exchange and attenuates lung damage in experimental lipopolysaccharide-induced lung injury. *ANESTHESIOLOGY* 2009; 111:1238–48

14. Reutershan J, Chang D, Hayes JK, Ley K: Protective effects of isoflurane pretreatment in endotoxin-induced lung injury. *ANESTHESIOLOGY* 2006; 104:511–7
15. Ding L, Quinlan KB, Elliott WM, Hamodat M, Paré PD, Hogg JC, Hayashi S: A lung tissue bank for gene expression studies in chronic obstructive pulmonary disease. *COPD* 2004; 1:191–204
16. Gosselink JV, Hayashi S, Chau E, Cooper J, Elliott WM, Hogg JC: Evaluation of small sample cDNA amplification for microdissected airway expression profiling in COPD. *COPD* 2007; 4:91–105
17. Hoshino Y, Mio T, Nagai S, Miki H, Ito I, Izumi T: Cytotoxic effects of cigarette smoke extract on an alveolar type II cell-derived cell line. *Am J Physiol Lung Cell Mol Physiol* 2001; 281:L509–16
18. Pugin J, Ricou B, Steinberg KP, Suter PM, Martin TR: Proinflammatory activity in bronchoalveolar lavage fluids from patients with ARDS, a prominent role for interleukin-1. *Am J Respir Crit Care Med* 1996; 153(6 pt 1):1850–6
19. Rudolph U, Knoflach F: Beyond classical benzodiazepines: Novel therapeutic potential of GABAA receptor subtypes. *Nat Rev Drug Discov* 2011; 10:685–97
20. Mohler H, Fritschy JM, Rudolph U: A new benzodiazepine pharmacology. *J Pharmacol Exp Ther* 2002; 300:2–8
21. Connolly CN, Krishek BJ, McDonald BJ, Smart TG, Moss SJ: Assembly and cell surface expression of heteromeric and homomeric gamma-aminobutyric acid type A receptors. *J Biol Chem* 1996; 271:89–96
22. Dong H, Xiang YY, Farchi N, Ju W, Wu Y, Chen L, Wang Y, Hochner B, Yang B, Soreq H, Lu WY: Excessive expression of acetylcholinesterase impairs glutamatergic synaptogenesis in hippocampal neurons. *J Neurosci* 2004; 24:8950–60
23. Xiang YY, Dong H, Wan Y, Li J, Yee A, Yang BB, Lu WY: Versican G3 domain regulates neurite growth and synaptic transmission of hippocampal neurons by activation of epidermal growth factor receptor. *J Biol Chem* 2006; 281:19358–68
24. Bae JJ, Xiang YY, Martinez-Canabal A, Frankland PW, Yang BB, Lu WY: Increased transforming growth factor- $\beta$ 1 modulates glutamate receptor expression in the hippocampus. *Int J Physiol Pathophysiol Pharmacol* 2011; 3:9–20
25. Caraiscos VB, Newell JG, You-Ten KE, Elliott EM, Rosahl TW, Wafford KA, MacDonald JF, Orser BA: Selective enhancement of tonic GABAergic inhibition in murine hippocampal neurons by low concentrations of the volatile anesthetic isoflurane. *J Neurosci* 2004; 24:8454–8
26. Lu WY, Xiong ZG, Orser BA, MacDonald JF: Multiple sites of action of neomycin, Mg<sup>2+</sup> and spermine on the NMDA receptors of rat hippocampal CA1 pyramidal neurones. *J Physiol (Lond)* 1998; 512 (pt 1):29–46
27. Lu W, Man H, Ju W, Trimble WS, MacDonald JF, Wang YT: Activation of synaptic NMDA receptors induces membrane insertion of new AMPA receptors and LTP in cultured hippocampal neurons. *Neuron* 2001; 29:243–54
28. Cagnina RE, Ramos SI, Marshall MA, Wang G, Frazier CR, Linden J: Adenosine A2B receptors are highly expressed on murine type II alveolar epithelial cells. *Am J Physiol Lung Cell Mol Physiol* 2009; 297:L467–74
29. Orser BA, Wang LY, Pennefather PS, MacDonald JF: Propofol modulates activation and desensitization of GABAA receptors in cultured murine hippocampal neurons. *J Neurosci* 1994; 14:7747–60
30. Lemkuil BP, Head BP, Pearn ML, Patel HH, Drummond JC, Patel PM: Isoflurane neurotoxicity is mediated by p75NTR-RhoA activation and actin depolymerization. *ANESTHESIOLOGY* 2011; 114:49–57
31. Hedblom E, Kirkness EF: A novel class of GABAA receptor subunit in tissues of the reproductive system. *J Biol Chem* 1997; 272:15346–50
32. Neelands TR, Macdonald RL: Incorporation of the  $\pi$  subunit into functional gamma-aminobutyric Acid(A) receptors. *Mol Pharmacol* 1999; 56:598–610
33. Johnston GA: GABAC receptors: Relatively simple transmitter-gated ion channels? *Trends Pharmacol Sci* 1996; 17:319–23
34. Enz R, Cutting GR: GABAC receptor rho subunits are heterogeneously expressed in the human CNS and form homo- and heterooligomers with distinct physical properties. *Eur J Neurosci* 1999; 11:41–50
35. Milligan CJ, Buckley NJ, Garret M, Deuchars J, Deuchars SA: Evidence for inhibition mediated by coassembly of GABAA and GABAC receptor subunits in native central neurons. *J Neurosci* 2004; 24:7241–50
36. Mehta AK, Ticku MK: An update on GABAA receptors. *Brain Res Brain Res Rev* 1999; 29:196–217
37. Steiger JL, Russek SJ: GABAA receptors: Building the bridge between subunit mRNAs, their promoters, and cognate transcription factors. *Pharmacol Ther* 2004; 101:259–81
38. Barnes EM Jr: Use-dependent regulation of GABAA receptors. *Int Rev Neurobiol* 1996; 39:53–76
39. Benkowitz C, Banks MI, Pearce RA: Influence of GABAA receptor gamma2 splice variants on receptor kinetics and isoflurane modulation. *ANESTHESIOLOGY* 2004; 101:924–36
40. Kolodnick JE, Peters-Golden M, Larios J, Toews GB, Thannickal VJ, Moore BB: Prostaglandin E2 inhibits fibroblast to myofibroblast transition *via* E. prostanoid receptor 2 signaling and cyclic adenosine monophosphate elevation. *Am J Respir Cell Mol Biol* 2003; 29:537–44
41. McAnulty RJ, Hernandez-Rodriguez NA, Mutsaers SE, Coker RK, Laurent GJ: Indomethacin suppresses the anti-proliferative effects of transforming growth factor-beta isoforms on fibroblast cell cultures. *Biochem J* 1997; 321 (pt 3):639–43
42. Morsy MA, Isohama Y, Miyata T: Prostaglandin E(2) increases surfactant secretion *via* the EP(1) receptor in rat alveolar type II cells. *Eur J Pharmacol* 2001; 426:21–4
43. Church RJ, Jania LA, Koller BH: Prostaglandin E(2) produced by the lung augments the effector phase of allergic inflammation. *J Immunol* 2012; 188:4093–102
44. Sato T, Liu X, Nelson A, Nakanishi M, Kanaji N, Wang X, Kim M, Li Y, Sun J, Michalski J, Patil A, Basma H, Holz O, Magnussen H, Rennard SI: Reduced miR-146a increases prostaglandin E<sub>2</sub> in chronic obstructive pulmonary disease fibroblasts. *Am J Respir Crit Care Med* 2010; 182:1020–9
45. Sato T, Araki I, Kushikata T, Ohkawa H, Ishihara H, Matsuki A: Decreased hypothalamic prostaglandin D2 and prostaglandin E2 contents during isoflurane anaesthesia in rats. *Can J Anaesth* 1995; 42:1031–4
46. Molliex S, Crestani B, Dureuil B, Rolland C, Aubier M, Desmonts JM: Differential effects of isoflurane and i.v. anaesthetic agents on metabolism of alveolar type II cells. *Br J Anaesth* 1999; 82:767–9
47. Chen BC, Yu CC, Lei HC, Chang MS, Hsu MJ, Huang CL, Chen MC, Sheu JR, Chen TF, Chen TL, Inoue H, Lin CH: Bradykinin B2 receptor mediates NF-kappaB activation and cyclooxygenase-2 expression *via* the Ras/Raf-1/ERK pathway in human airway epithelial cells. *J Immunol* 2004; 173:5219–28
48. Hong SH, Choi HB, Kim SU, McLarnon JG: Mitochondrial ligand inhibits store-operated calcium influx and COX-2 production in human microglia. *J Neurosci Res* 2006; 83:1293–8
49. Mignen O, Thompson JL, Shuttleworth TJ: Orai1 subunit stoichiometry of the mammalian CRAC channel pore. *J Physiol (Lond)* 2008; 586:419–25
50. Bjurstöm H, Wang J, Wang J, Ericsson I, Bengtsson M, Liu Y, Kumar-Mendu S, Issazadeh-Navikas S, Birnir B: GABA, a natural immunomodulator of T lymphocytes. *J Neuroimmunol* 2008; 205:44–50
51. Gusarova GA, Trejo HE, Dada LA, Briva A, Welch LC, Hamaoka RB, Mutlu GM, Chandel NS, Prakriya M, Sznajder JI: Hypoxia leads to Na,K-ATPase downregulation *via* Ca(2+) release-activated Ca(2+) channels and AMPK activation. *Mol Cell Biol* 2011; 31:3546–56
